# Supplementary material for: Advanced catalytic CO2 hydrogenation on Ni/ZrO2 with light induced oxygen vacancy formation in photothermal conditions at medium-low temperatures
Source: Royal Society of Chemistry journal article supplement (doi:10.1039/d2cy00439a), 2022-01-01
Supplement: d2cy00439a1.pdf [file d2cy00439a1.pdf]

## 1 **Supplementary Information**

2 Supplementary data associated with this article can be found in the online version.

### 3 **Advanced catalytic CO<sub>2</sub> hydrogenation on Ni/ZrO<sub>2</sub> with promoted** 4 **oxygen vacancies formation in photothermal condition at medium-** 5 **low temperatures: experimental and computational studies**

6 Xin Ding<sup>a</sup>, Xu Liu<sup>a,#</sup>, Jiahui Cheng<sup>a</sup>, Lingzhao Kong<sup>b</sup>, Yang Guo<sup>a\*</sup>

7 <sup>a</sup> Key Laboratory of Thermo-Fluid Science and Engineering, Ministry of Education, School of  
8 Energy and Power Engineering, Xi'an Jiaotong University, Xi'an, Shaanxi, PR China 710049

9 <sup>b</sup> CAS Key Laboratory of Low-Carbon Conversion Science and Engineering, Shanghai  
10 Advanced Research Institute, Chinese Academy of Sciences, Shanghai 201210, P.R. China.

11 # Equal contribution

12 \*Corresponding author

13 <Corresponding author: [guoyang@xjtu.edu.cn](mailto:guoyang@xjtu.edu.cn)>

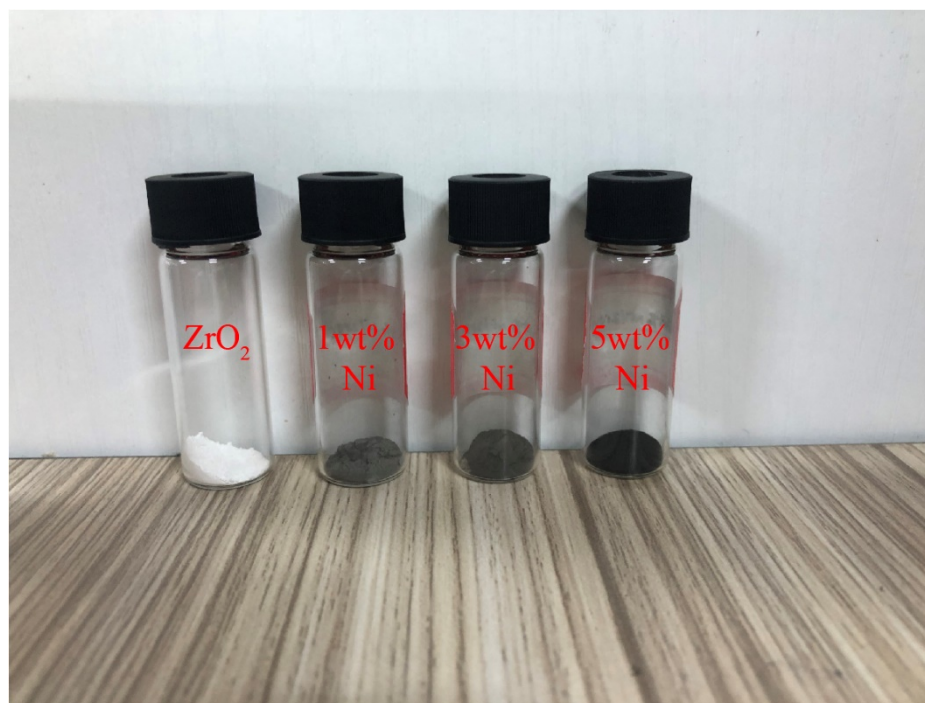

14

15

Figure S1. Digital photos of pristine ZrO<sub>2</sub>, 1wt%, 3wt% and 5wt% Ni/ZrO<sub>2</sub>

16

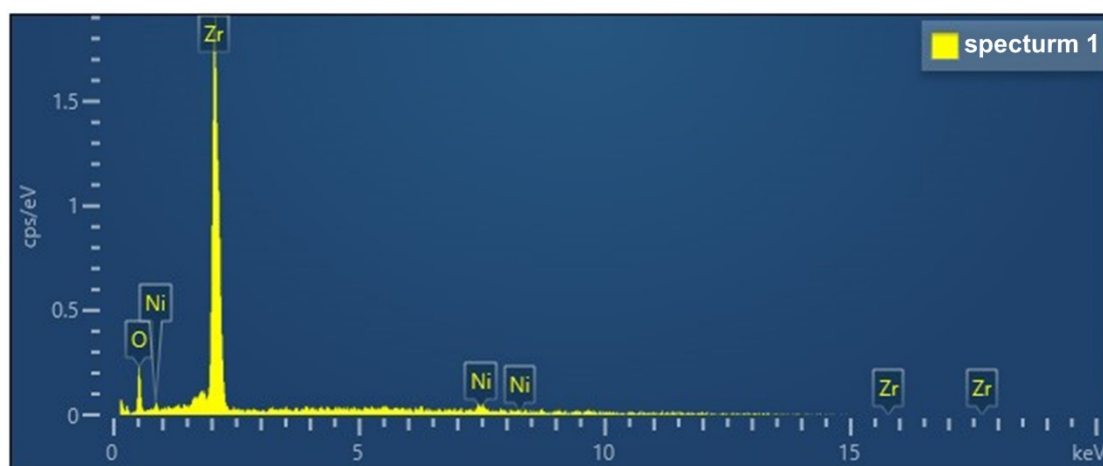

17

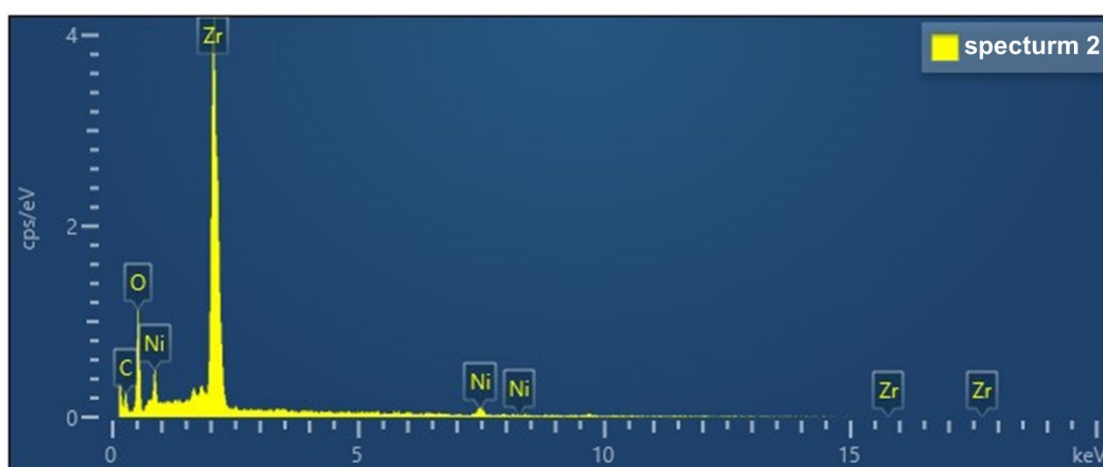

18

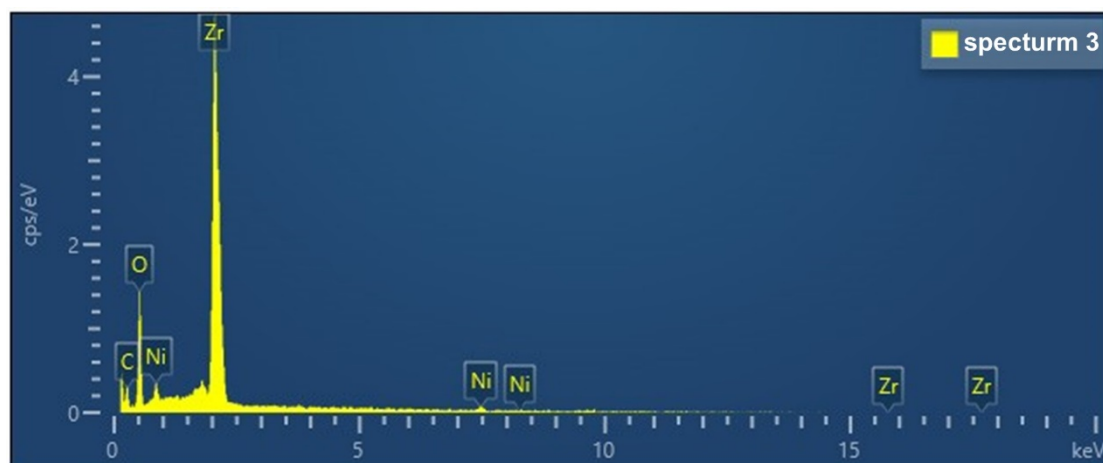

19

Figure S2. EDX component analysis after TC (spectrum 1)

20

or PTC (spectrum 2 and 3) reaction

21

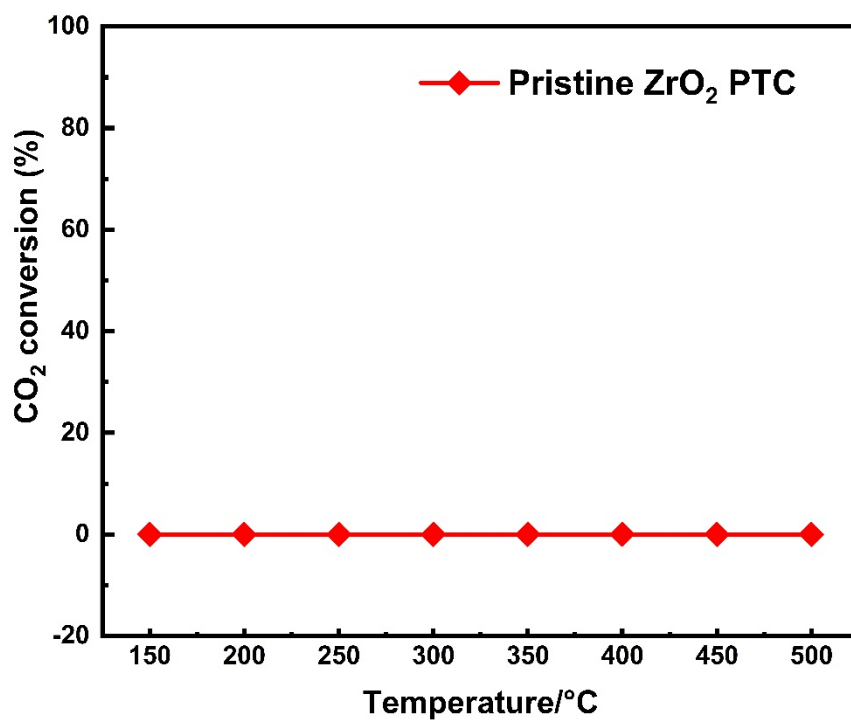

22

23 Figure S3. The catalytic conversion rate of pure  $\text{ZrO}_2$  used in photothermal  $\text{CO}_2$  hydrogenation

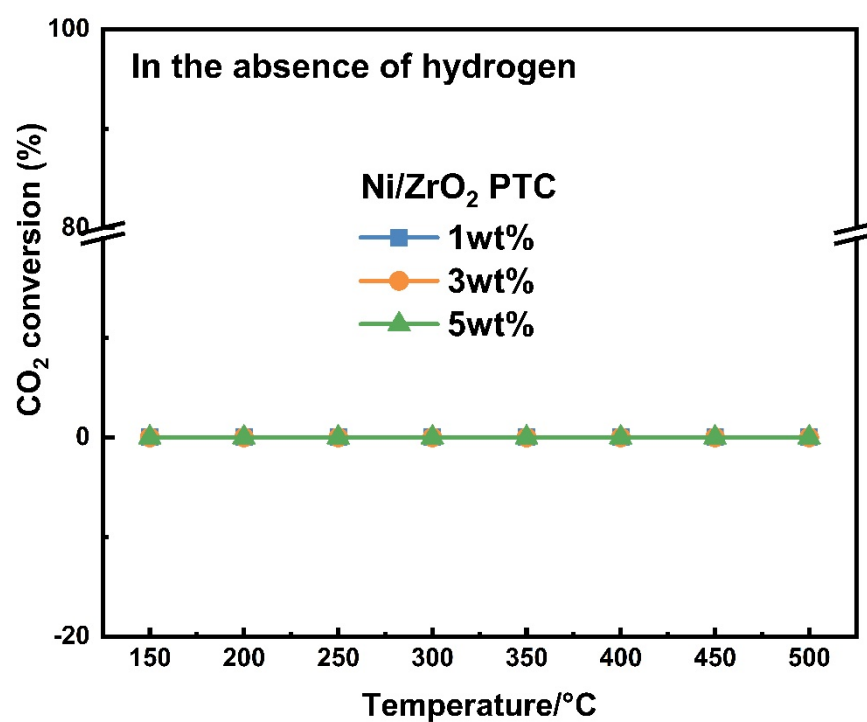

24

25 Figure S4. Photothermal  $\text{CO}_2$  conversion rate of 1wt%, 3wt% and 5wt%  $\text{Ni/ZrO}_2$

26 in the absence of hydrogen

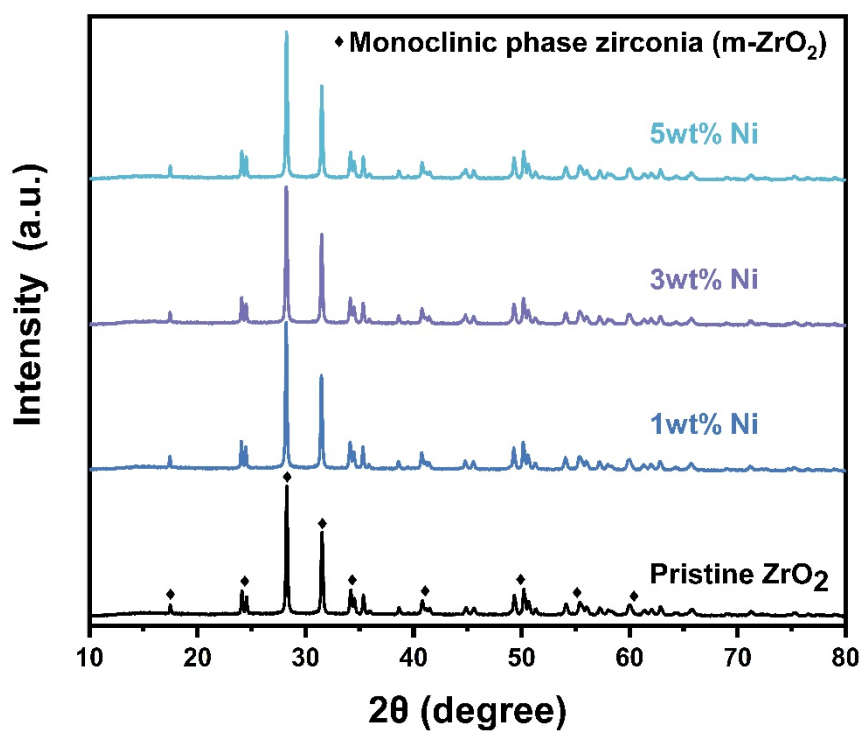

Figure S5. XRD pattern of pristine  $\text{ZrO}_2$ , fresh  $\text{Ni/ZrO}_2$  with different loading

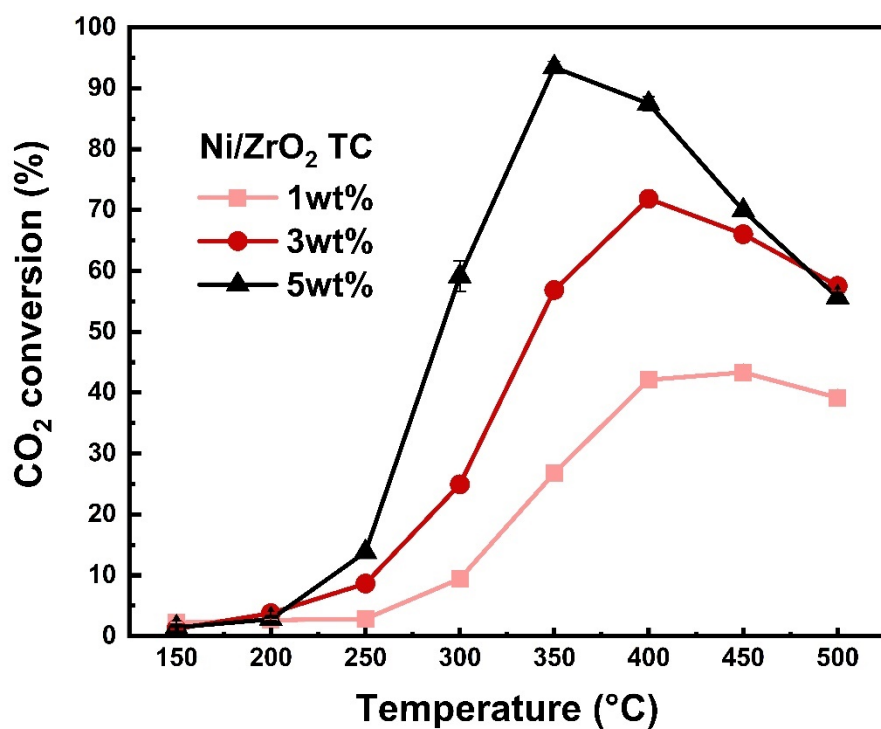

Figure S6.  $\text{CO}_2$  conversion rate in thermally catalytic  $\text{CO}_2$  hydrogenation reaction over  $\text{Ni/ZrO}_2$  catalysts with different metal loading

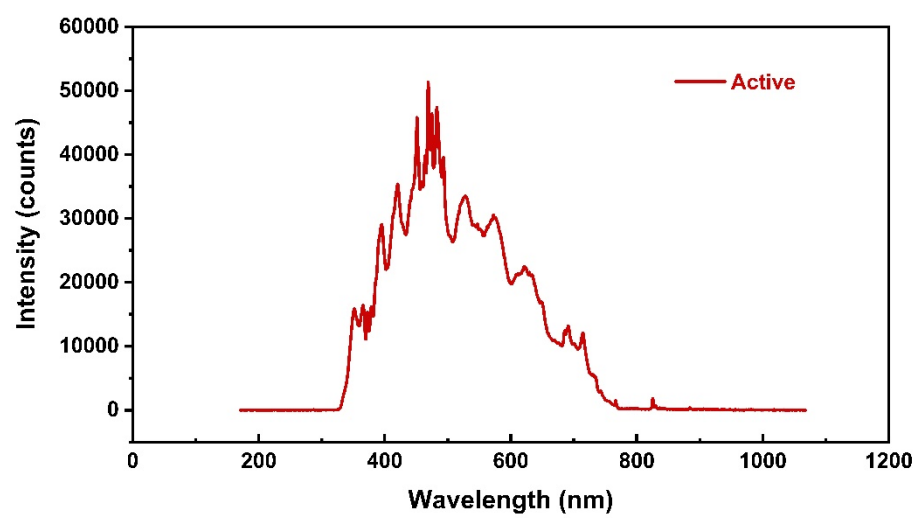

Figure S7. Spectral image of Xe lamp
